# Supplementary material for: Elevational Pattern of Leaf Mine Diversity on Quercus variabilis Blume at Baotianman, Henan, China
Source: MDPI journal article supplement (doi:10.3390/insects14010007), 2022-12-21
Supplement: s1 [file s1]

**Table S1.** Number of different mine types on *Quercus variabilis* Blume at different elevations

| Sampled tree No. | Longitude (°) | Latitude (°) | Elevation (m) | LM01 | LM03 | LM05 | LM06 | LM08 | LM10 | LM11 | LM12 | LM15 | LM19 | Total mine number |
|------------------|---------------|--------------|---------------|------|------|------|------|------|------|------|------|------|------|-------------------|
| 01               | 111.9308709   | 33.511       | 1345          | 0    | 0    | 0    | 0    | 5    | 2    | 0    | 0    | 1    | 2    | 10                |
| 02               | 111.9302263   | 33.509746    | 1306          | 0    | 0    | 0    | 0    | 6    | 0    | 4    | 0    | 0    | 0    | 10                |
| 03               | 111.9302263   | 33.509746    | 1306          | 0    | 0    | 0    | 0    | 10   | 0    | 14   | 0    | 0    | 1    | 25                |
| 04               | 111.9302263   | 33.509746    | 1306          | 4    | 0    | 0    | 0    | 6    | 0    | 7    | 0    | 3    | 2    | 22                |
| 05               | 111.9302263   | 33.509657    | 1303          | 0    | 0    | 0    | 0    | 17   | 2    | 2    | 0    | 1    | 0    | 22                |
| 07               | 111.9294046   | 33.508891    | 1292          | 0    | 0    | 0    | 0    | 12   | 7    | 2    | 0    | 8    | 1    | 30                |
| 08               | 111.9294046   | 33.508891    | 1292          | 0    | 1    | 0    | 2    | 29   | 6    | 3    | 0    | 1    | 7    | 49                |
| 09               | 111.9294046   | 33.508891    | 1292          | 0    | 0    | 0    | 0    | 18   | 9    | 2    | 0    | 0    | 11   | 40                |
| 06               | 111.9299041   | 33.509209    | 1290          | 0    | 0    | 0    | 2    | 28   | 3    | 7    | 0    | 2    | 12   | 54                |
| 12               | 111.9287655   | 33.507217    | 1255          | 0    | 0    | 0    | 0    | 26   | 2    | 0    | 0    | 0    | 1    | 29                |
| 10               | 111.9295495   | 33.507795    | 1254          | 0    | 0    | 0    | 0    | 46   | 10   | 5    | 0    | 1    | 2    | 64                |
| 11               | 111.9295495   | 33.507795    | 1254          | 0    | 0    | 0    | 0    | 12   | 2    | 4    | 0    | 0    | 1    | 19                |
| 13               | 111.9291145   | 33.507208    | 1249          | 0    | 0    | 0    | 0    | 8    | 5    | 2    | 0    | 0    | 9    | 24                |
| 14               | 111.9294904   | 33.507477    | 1246          | 0    | 0    | 0    | 0    | 35   | 2    | 0    | 0    | 6    | 14   | 57                |
| 15               | 111.9289158   | 33.506881    | 1241          | 0    | 0    | 0    | 0    | 25   | 3    | 8    | 0    | 8    | 5    | 49                |
| 16               | 111.928701    | 33.506657    | 1236          | 0    | 0    | 0    | 2    | 38   | 5    | 4    | 0    | 1    | 7    | 57                |
| 17               | 111.9286204   | 33.506501    | 1230          | 2    | 0    | 0    | 0    | 57   | 15   | 10   | 0    | 5    | 19   | 108               |
| 18               | 111.9287385   | 33.505856    | 1208          | 0    | 0    | 0    | 2    | 15   | 7    | 1    | 0    | 4    | 10   | 39                |
| 19               | 111.9282176   | 33.505408    | 1198          | 0    | 0    | 0    | 2    | 31   | 6    | 2    | 0    | 0    | 3    | 44                |
| 20               | 111.9277343   | 33.504781    | 1194          | 2    | 0    | 0    | 0    | 13   | 6    | 0    | 0    | 4    | 2    | 27                |
| 21               | 111.927251    | 33.504369    | 1190          | 0    | 0    | 0    | 0    | 47   | 19   | 2    | 0    | 2    | 5    | 75                |
| 22               | 111.9260805   | 33.503326    | 1170          | 0    | 0    | 0    | 1    | 34   | 9    | 2    | 0    | 5    | 2    | 53                |
| 23               | 111.925114    | 33.501937    | 1160          | 0    | 0    | 0    | 0    | 29   | 3    | 0    | 0    | 0    | 2    | 34                |
| 25               | 111.925726    | 33.502412    | 1153          | 0    | 0    | 0    | 0    | 4    | 4    | 0    | 0    | 0    | 3    | 11                |
| 26               | 111.9264777   | 33.502977    | 1153          | 5    | 0    | 0    | 2    | 22   | 7    | 0    | 0    | 6    | 10   | 52                |
| 27               | 111.9266549   | 33.503102    | 1152          | 0    | 0    | 0    | 3    | 51   | 10   | 7    | 0    | 1    | 4    | 76                |
| 24               | 111.9253394   | 33.501812    | 1147          | 0    | 0    | 0    | 0    | 13   | 1    | 2    | 0    | 1    | 0    | 17                |
| 28               | 111.9265475   | 33.502431    | 1144          | 0    | 0    | 0    | 0    | 15   | 2    | 0    | 0    | 0    | 1    | 18                |
| 29               | 111.9252478   | 33.498425    | 1091          | 0    | 0    | 0    | 0    | 14   | 5    | 1    | 0    | 0    | 9    | 29                |
| 30               | 111.9251404   | 33.497887    | 1071          | 0    | 0    | 0    | 1    | 3    | 1    | 0    | 0    | 1    | 5    | 11                |
| 32               | 111.9254088   | 33.497395    | 1066          | 1    | 0    | 0    | 0    | 31   | 10   | 1    | 0    | 1    | 14   | 58                |

|    |             |           |      |   |   |   |    |    |    |    |   |    |    |     |
|----|-------------|-----------|------|---|---|---|----|----|----|----|---|----|----|-----|
| 31 | 111.9250867 | 33.497171 | 1064 | 0 | 0 | 0 | 0  | 17 | 10 | 1  | 0 | 0  | 3  | 31  |
| 33 | 111.9253819 | 33.497006 | 1060 | 0 | 0 | 0 | 0  | 4  | 1  | 0  | 0 | 0  | 0  | 5   |
| 34 | 111.9250598 | 33.496773 | 1055 | 0 | 0 | 0 | 0  | 6  | 3  | 0  | 0 | 0  | 0  | 9   |
| 35 | 111.9242009 | 33.4979   | 1040 | 1 | 0 | 0 | 0  | 2  | 3  | 0  | 0 | 0  | 7  | 13  |
| 36 | 111.9232025 | 33.498289 | 1018 | 0 | 0 | 0 | 0  | 12 | 6  | 3  | 0 | 0  | 1  | 22  |
| 39 | 111.9214687 | 33.498449 | 1013 | 0 | 0 | 0 | 0  | 12 | 3  | 0  | 0 | 0  | 10 | 25  |
| 38 | 111.9221128 | 33.49836  | 1011 | 0 | 0 | 0 | 2  | 18 | 5  | 3  | 0 | 0  | 1  | 29  |
| 37 | 111.9223812 | 33.498181 | 1003 | 0 | 0 | 0 | 0  | 5  | 2  | 0  | 0 | 0  | 4  | 11  |
| 40 | 111.9190052 | 33.498774 | 970  | 0 | 0 | 0 | 0  | 5  | 9  | 2  | 0 | 0  | 7  | 23  |
| 41 | 111.9192198 | 33.497861 | 957  | 0 | 0 | 0 | 0  | 10 | 4  | 0  | 0 | 0  | 2  | 16  |
| 42 | 111.9188547 | 33.497055 | 955  | 0 | 0 | 0 | 13 | 31 | 12 | 13 | 0 | 2  | 4  | 75  |
| 43 | 111.917996  | 33.496437 | 947  | 0 | 0 | 0 | 0  | 17 | 18 | 1  | 1 | 6  | 16 | 59  |
| 44 | 111.9172446 | 33.495542 | 916  | 0 | 0 | 0 | 0  | 31 | 12 | 3  | 0 | 10 | 11 | 67  |
| 45 | 111.9169225 | 33.494423 | 915  | 0 | 0 | 0 | 0  | 6  | 10 | 7  | 0 | 3  | 7  | 33  |
| 46 | 111.9161712 | 33.493796 | 909  | 0 | 0 | 0 | 0  | 10 | 9  | 5  | 0 | 0  | 8  | 32  |
| 47 | 111.9181407 | 33.494611 | 889  | 1 | 0 | 0 | 0  | 14 | 12 | 0  | 0 | 3  | 9  | 39  |
| 48 | 111.9194825 | 33.495279 | 875  | 0 | 0 | 0 | 6  | 14 | 4  | 8  | 0 | 13 | 15 | 60  |
| 49 | 111.9183231 | 33.493761 | 858  | 0 | 0 | 0 | 0  | 13 | 10 | 11 | 0 | 4  | 26 | 64  |
| 50 | 111.9175019 | 33.492588 | 855  | 0 | 0 | 0 | 6  | 51 | 8  | 38 | 0 | 13 | 30 | 146 |
| 52 | 111.9129947 | 33.493128 | 845  | 0 | 0 | 0 | 0  | 4  | 4  | 1  | 0 | 0  | 10 | 19  |
| 53 | 111.9122973 | 33.493799 | 841  | 0 | 0 | 0 | 0  | 9  | 6  | 3  | 0 | 0  | 4  | 22  |
| 51 | 111.9159725 | 33.492386 | 839  | 0 | 0 | 0 | 0  | 7  | 2  | 5  | 0 | 0  | 8  | 22  |
| 54 | 111.9125657 | 33.495232 | 830  | 0 | 0 | 0 | 2  | 15 | 4  | 6  | 0 | 0  | 1  | 28  |
| 55 | 111.9105323 | 33.494354 | 822  | 4 | 0 | 0 | 0  | 31 | 9  | 10 | 0 | 5  | 26 | 85  |
| 59 | 111.901592  | 33.496436 | 807  | 0 | 0 | 0 | 0  | 7  | 1  | 2  | 0 | 0  | 6  | 16  |
| 58 | 111.9023855 | 33.495164 | 792  | 0 | 0 | 0 | 0  | 8  | 0  | 5  | 0 | 0  | 1  | 14  |
| 56 | 111.9058176 | 33.494681 | 790  | 0 | 0 | 0 | 1  | 2  | 1  | 1  | 0 | 0  | 1  | 6   |
| 57 | 111.9042302 | 33.494954 | 781  | 0 | 0 | 0 | 0  | 6  | 4  | 1  | 0 | 0  | 5  | 16  |
| 60 | 111.897946  | 33.494826 | 746  | 0 | 0 | 0 | 0  | 16 | 7  | 7  | 0 | 0  | 3  | 33  |
| 61 | 111.8955819 | 33.494818 | 725  | 0 | 0 | 0 | 0  | 1  | 0  | 3  | 0 | 1  | 2  | 7   |
| 62 | 111.8930784 | 33.491337 | 682  | 0 | 0 | 0 | 2  | 26 | 6  | 1  | 0 | 0  | 2  | 37  |
| 63 | 111.8914489 | 33.489494 | 669  | 0 | 0 | 0 | 2  | 26 | 9  | 8  | 0 | 0  | 7  | 52  |
| 64 | 111.8893265 | 33.488404 | 644  | 0 | 0 | 0 | 0  | 2  | 3  | 4  | 0 | 0  | 0  | 9   |

|    |             |           |     |    |   |   |    |     |    |    |   |   |    |     |
|----|-------------|-----------|-----|----|---|---|----|-----|----|----|---|---|----|-----|
| 82 | 111.8937642 | 33.320967 | 637 | 0  | 0 | 0 | 0  | 0   | 5  | 1  | 0 | 0 | 0  | 6   |
| 83 | 111.8947666 | 33.321527 | 637 | 0  | 0 | 0 | 3  | 29  | 11 | 6  | 0 | 0 | 2  | 51  |
| 65 | 111.8882546 | 33.486077 | 636 | 1  | 0 | 0 | 0  | 16  | 0  | 9  | 0 | 0 | 2  | 28  |
| 66 | 111.88804   | 33.483928 | 633 | 0  | 0 | 0 | 1  | 20  | 2  | 6  | 0 | 0 | 8  | 37  |
| 84 | 111.8929817 | 33.321241 | 588 | 0  | 0 | 0 | 0  | 6   | 0  | 0  | 0 | 0 | 2  | 8   |
| 81 | 111.8929067 | 33.321187 | 586 | 0  | 0 | 0 | 0  | 20  | 6  | 4  | 0 | 2 | 3  | 35  |
| 85 | 111.8926226 | 33.321416 | 571 | 1  | 0 | 0 | 4  | 22  | 2  | 3  | 1 | 0 | 0  | 33  |
| 88 | 111.8884961 | 33.322814 | 563 | 0  | 0 | 0 | 17 | 38  | 8  | 6  | 0 | 0 | 5  | 74  |
| 80 | 111.8921027 | 33.320739 | 560 | 0  | 0 | 0 | 8  | 135 | 27 | 14 | 0 | 0 | 9  | 193 |
| 86 | 111.8909344 | 33.32183  | 553 | 10 | 0 | 0 | 0  | 17  | 0  | 0  | 0 | 0 | 1  | 28  |
| 89 | 111.8877459 | 33.32277  | 552 | 0  | 0 | 0 | 2  | 17  | 2  | 2  | 0 | 0 | 0  | 23  |
| 87 | 111.8903342 | 33.321758 | 550 | 0  | 0 | 0 | 2  | 18  | 6  | 2  | 0 | 1 | 1  | 30  |
| 90 | 111.887494  | 33.322523 | 537 | 0  | 0 | 0 | 10 | 40  | 12 | 3  | 0 | 0 | 5  | 70  |
| 91 | 111.8871886 | 33.322012 | 523 | 0  | 0 | 0 | 4  | 25  | 6  | 0  | 0 | 0 | 2  | 37  |
| 79 | 111.8910575 | 33.320071 | 497 | 0  | 0 | 0 | 9  | 38  | 13 | 2  | 0 | 0 | 2  | 64  |
| 78 | 111.890618  | 33.319731 | 477 | 0  | 0 | 0 | 2  | 14  | 11 | 3  | 0 | 0 | 5  | 35  |
| 92 | 111.8869044 | 33.320474 | 467 | 0  | 0 | 0 | 19 | 49  | 13 | 3  | 1 | 0 | 16 | 101 |
| 93 | 111.8867972 | 33.320294 | 463 | 0  | 0 | 0 | 6  | 16  | 4  | 1  | 1 | 0 | 0  | 28  |
| 77 | 111.8900124 | 33.319063 | 457 | 0  | 0 | 0 | 3  | 16  | 13 | 2  | 0 | 0 | 2  | 36  |
| 74 | 111.8885653 | 33.318032 | 439 | 0  | 0 | 0 | 3  | 4   | 4  | 0  | 0 | 0 | 0  | 11  |
| 75 | 111.8891013 | 33.318301 | 438 | 1  | 0 | 1 | 0  | 48  | 23 | 9  | 2 | 0 | 8  | 92  |
| 76 | 111.8893692 | 33.318615 | 437 | 0  | 0 | 0 | 10 | 48  | 7  | 0  | 0 | 0 | 3  | 68  |
| 73 | 111.888351  | 33.317732 | 436 | 0  | 0 | 0 | 2  | 6   | 3  | 0  | 0 | 0 | 1  | 12  |
| 72 | 111.8879758 | 33.317329 | 430 | 0  | 0 | 0 | 0  | 13  | 0  | 0  | 0 | 0 | 0  | 13  |
| 71 | 111.8877615 | 33.317194 | 423 | 0  | 0 | 0 | 3  | 25  | 6  | 0  | 0 | 0 | 5  | 39  |
| 70 | 111.8881151 | 33.316615 | 414 | 2  | 0 | 0 | 0  | 31  | 8  | 2  | 0 | 1 | 5  | 49  |
| 69 | 111.8883722 | 33.316005 | 383 | 1  | 0 | 0 | 3  | 23  | 5  | 1  | 0 | 0 | 6  | 39  |
| 94 | 111.885468  | 33.315954 | 348 | 0  | 0 | 0 | 15 | 60  | 16 | 3  | 0 | 0 | 27 | 121 |
| 68 | 111.8877236 | 33.313844 | 333 | 1  | 0 | 0 | 8  | 61  | 37 | 4  | 1 | 0 | 4  | 116 |
| 67 | 111.8874128 | 33.313306 | 330 | 0  | 0 | 0 | 0  | 8   | 6  | 2  | 0 | 0 | 6  | 22  |

Note: Sampled trees with the strikeout were not included in our analysis because of several tree samples at the same location

**Table S2.** Functional characteristics of different leaf mine types on *Quercus variabilis* Blume

| LM   | Genus                 | Oviposition | Exit | MineShape | MineDepth | VeinLimited | Frass | LinearPart | BlotchPart | Placement | Transition | MineArea (cm <sup>2</sup> ) |
|------|-----------------------|-------------|------|-----------|-----------|-------------|-------|------------|------------|-----------|------------|-----------------------------|
| LM01 | <i>Acrocercops</i>    | U           | U    | LB        | E         | N           | FF    | PL         | OB         | RM        | N          | 5.213                       |
| LM03 | <i>Caloptilia</i>     | L           | L    | LB        | LP        | N           | FG    | PL         | TeB        | LT        | MO         | 2.440                       |
| LM05 | <i>Dactylispa</i>     | U           | U    | B         | FD        | N           | EF    | N          | OB         | LM        | N          | 3.703                       |
| LM06 | <i>Ectoedemia</i>     | U           | U    | LB        | UP        | N           | FP    | PL         | OB         | RM        | N          | 0.690                       |
| LM08 | <i>Phyllonorycter</i> | L           | L    | LB        | LP        | Y           | FF    | PL         | TeB        | RM        | EP         | 0.665                       |
| LM10 | <i>Stigmella</i>      | U           | U    | L         | UP        | N           | SFL   | SpL        | N          | RM        | N          | 0.803                       |
| LM11 | <i>Tischeria</i>      | U           | U    | B         | UP        | N           | EF    | N          | OB         | RM        | N          | 2.151                       |
| LM12 | <i>Trachys</i>        | U           | U    | B         | FD        | N           | FT    | N          | OB         | LM        | N          | 8.050                       |
| LM15 | <i>Chrysopeleia</i>   | U           | U    | B         | UP        | Y           | FP    | NO         | OB         | LI        | N          | 0.366                       |
| LM19 | <i>Profenusa</i>      | U           | U    | B         | FD        | Y           | FP    | N          | TrB        | RM        | N          | 0.898                       |

Note: (1) Oviposition (or Exit): U upper, L lower; (2) MS (mine shape): LB linear-blotch, B blotch, L linear; (3) MD (mine depth): E epidermis, LP lower parenchyma, FD full depth, UP upper parenchyma; (4) Frass: FF free of frass, FG frass grain, EF ejection of frass, FP frass pile, SPL single frass line, FT frass thread; (5) LP (linear part): PL pure linear, SpL serpentine linear mine ; (6) BP (blotch part): OB ordinary blotch, TeB tentiform blotch, TrB trumpet blotch; (7) Placement: RM random, LT leaf tip, LI leaf inner area; (8) Transition: MO from mining to other feeding habits, EP from epidermis to parenchyma; (9) VL vein limited; (10) N No, Y Yes

**Table S3.** Taxonomic status of different leaf mine types on *Quercus variabilis* Blume

| LM   | Order       | Superfamily     | Family          | Genus                 | Note |
|------|-------------|-----------------|-----------------|-----------------------|------|
| LM01 | Lepidoptera | Gracillarioidea | Gracillariidae  | <i>Acrocercops</i>    | ?    |
| LM03 | Lepidoptera | Gracillarioidea | Gracillariidae  | <i>Caloptilia</i>     |      |
| LM05 | Coleoptera  | Chrysomeloidea  | Chrysomelidae   | <i>Dactylispa</i>     |      |
| LM06 | Lepidoptera | Nepticuloidea   | Nepticulidae    | <i>Ectoedemia</i>     |      |
| LM08 | Lepidoptera | Gracillarioidea | Gracillariidae  | <i>Phyllonorycter</i> |      |
| LM10 | Lepidoptera | Nepticuloidea   | Nepticulidae    | <i>Stigmella</i>      |      |
| LM11 | Lepidoptera | Tischerioidea   | Tischeriidae    | <i>Tischeria</i>      |      |
| LM12 | Coleoptera  | Buprestoidea    | Buprestidae     | <i>Trachys</i>        |      |
| LM15 | Lepidoptera | Gelechioidea    | Cosmopterigidae | <i>Chrysopeleia</i>   | ?    |
| LM19 | Hymenoptera | Tenthredinoidea | Tenthredinidae  | <i>Profenusa</i>      | ?    |

**Table S4.** Number of leaf miner genera on *Quercus variabilis* Blume at different altitudes at Baotianman Scenic Area

| Sampled tree No. | Longitude (°) | Latitude (°) | Elevation (m) | Leaf miner genera                                                                            | Number of genera |
|------------------|---------------|--------------|---------------|----------------------------------------------------------------------------------------------|------------------|
| 01               | 111.9308709   | 33.51099997  | 1345          | <i>Phyllonorycter, Stigmella, Chrysopeleia, Profenusa</i>                                    | 4                |
| 02               | 111.9302263   | 33.5097464   | 1306          | <i>Phyllonorycter, Tischeria</i>                                                             | 2                |
| 03               | 111.9302263   | 33.5097464   | 1306          | <i>Phyllonorycter, Tischeria, Profenusa</i>                                                  | 3                |
| 04               | 111.9302263   | 33.5097464   | 1306          | <i>Acrocercops, Phyllonorycter, Tischeria, Chrysopeleia, Profenusa</i>                       | 5                |
| 05               | 111.9302263   | 33.5096569   | 1303          | <i>Phyllonorycter, Stigmella, Tischeria, Chrysopeleia</i>                                    | 4                |
| 07               | 111.9294046   | 33.5088909   | 1292          | <i>Phyllonorycter, Stigmella, Tischeria, Chrysopeleia, Profenusa</i>                         | 5                |
| 08               | 111.9294046   | 33.5088909   | 1292          | <i>Caloptilia, Ectoedemia, Phyllonorycter, Stigmella, Tischeria, Chrysopeleia, Profenusa</i> | 7                |
| 09               | 111.9294046   | 33.5088909   | 1292          | <i>Phyllonorycter, Stigmella, Tischeria, Profenusa</i>                                       | 4                |
| 06               | 111.9299041   | 33.5092091   | 1290          | <i>Ectoedemia, Phyllonorycter, Stigmella, Tischeria, Chrysopeleia, Profenusa</i>             | 6                |
| 12               | 111.9287655   | 33.5072167   | 1255          | <i>Phyllonorycter, Stigmella, Profenusa</i>                                                  | 3                |
| 10               | 111.9295495   | 33.50779471  | 1254          | <i>Phyllonorycter, Stigmella, Tischeria, Chrysopeleia, Profenusa</i>                         | 5                |
| 11               | 111.9295495   | 33.50779471  | 1254          | <i>Phyllonorycter, Stigmella, Tischeria, Profenusa</i>                                       | 4                |
| 13               | 111.9291145   | 33.50720808  | 1249          | <i>Phyllonorycter, Stigmella, Tischeria, Profenusa</i>                                       | 4                |
| 14               | 111.9294904   | 33.50747694  | 1246          | <i>Phyllonorycter, Stigmella, Chrysopeleia, Profenusa</i>                                    | 4                |
| 15               | 111.9289158   | 33.50688123  | 1241          | <i>Phyllonorycter, Stigmella, Tischeria, Chrysopeleia, Profenusa</i>                         | 5                |
| 16               | 111.928701    | 33.50665728  | 1236          | <i>Ectoedemia, Phyllonorycter, Stigmella, Tischeria, Chrysopeleia, Profenusa</i>             | 6                |

|    |             |             |      |                                                                                    |   |
|----|-------------|-------------|------|------------------------------------------------------------------------------------|---|
| 17 | 111.9286204 | 33.50650058 | 1230 | <i>Acrocercops Phyllonorycter, Stigmella, Tischeria, Chrysopeleia, Profenusa</i>   | 6 |
| 18 | 111.9287385 | 33.5058563  | 1208 | <i>Ectoedemia Phyllonorycter, Stigmella, Tischeria, Chrysopeleia, Profenusa</i>    | 6 |
| 19 | 111.9282176 | 33.50540832 | 1198 | <i>Ectoedemia, Phyllonorycter, Stigmella, Tischeria, Profenusa</i>                 | 5 |
| 20 | 111.9277343 | 33.50478138 | 1194 | <i>Acrocercops, Phyllonorycter, Stigmella, Chrysopeleia, Profenusa</i>             | 5 |
| 21 | 111.927251  | 33.50436924 | 1190 | <i>Phyllonorycter, Stigmella, Tischeria, Chrysopeleia, Profenusa</i>               | 5 |
| 22 | 111.9260805 | 33.50332555 | 1170 | <i>Ectoedemia, Phyllonorycter, Stigmella, Tischeria, Chrysopeleia, Profenusa</i>   | 6 |
| 23 | 111.925114  | 33.50193748 | 1160 | <i>Phyllonorycter, Stigmella, Profenusa</i>                                        | 3 |
| 25 | 111.925726  | 33.50241234 | 1153 | <i>Phyllonorycter, Stigmella, Profenusa</i>                                        | 3 |
| 26 | 111.9264777 | 33.50297683 | 1153 | <i>Acrocercops, Ectoedemia, Phyllonorycter, Stigmella, Chrysopeleia, Profenusa</i> | 6 |
| 27 | 111.9266549 | 33.50310228 | 1152 | <i>Ectoedemia, Phyllonorycter, Stigmella, Tischeria, Chrysopeleia, Profenusa</i>   | 6 |
| 24 | 111.9253394 | 33.50181236 | 1147 | <i>Phyllonorycter, Stigmella, Tischeria, Chrysopeleia</i>                          | 4 |
| 28 | 111.9265475 | 33.50243092 | 1144 | <i>Phyllonorycter, Stigmella, Profenusa</i>                                        | 3 |
| 29 | 111.9252478 | 33.49842451 | 1091 | <i>Phyllonorycter, Stigmella, Tischeria, Profenusa</i>                             | 4 |
| 30 | 111.9251404 | 33.49788738 | 1071 | <i>Ectoedemia, Phyllonorycter, Stigmella, Chrysopeleia, Profenusa</i>              | 5 |
| 32 | 111.9254088 | 33.4973953  | 1066 | <i>Acrocercops, Phyllonorycter, Stigmella, Tischeria, Chrysopeleia, Profenusa</i>  | 6 |
| 31 | 111.9250867 | 33.49717127 | 1064 | <i>Phyllonorycter, Stigmella, Tischeria, Profenusa</i>                             | 4 |
| 33 | 111.9253819 | 33.49700592 | 1060 | <i>Phyllonorycter, Stigmella</i>                                                   | 2 |
| 34 | 111.9250598 | 33.49677294 | 1055 | <i>Phyllonorycter, Stigmella</i>                                                   | 2 |

|    |             |             |      |                                                                                  |   |
|----|-------------|-------------|------|----------------------------------------------------------------------------------|---|
| 35 | 111.9242009 | 33.49790009 | 1040 | <i>Acrocercops, Phyllonorycter, Stigmella, Profenusa</i>                         | 4 |
| 36 | 111.9232025 | 33.49828872 | 1018 | <i>Phyllonorycter, Stigmella, Tischeria, Profenusa</i>                           | 4 |
| 39 | 111.9214687 | 33.49844868 | 1013 | <i>Phyllonorycter, Stigmella, Profenusa</i>                                      | 3 |
| 38 | 111.9221128 | 33.49835959 | 1011 | <i>Ectoedemia, Phyllonorycter, Stigmella, Tischeria, Profenusa</i>               | 5 |
| 37 | 111.9223812 | 33.49818075 | 1003 | <i>Phyllonorycter, Stigmella, Profenusa</i>                                      | 3 |
| 40 | 111.9190052 | 33.49877398 | 970  | <i>Phyllonorycter, Stigmella, Tischeria, Profenusa</i>                           | 4 |
| 41 | 111.9192198 | 33.49786112 | 957  | <i>Phyllonorycter, Stigmella, Profenusa</i>                                      | 3 |
| 42 | 111.9188547 | 33.49705536 | 955  | <i>Ectoedemia, Phyllonorycter, Stigmella, Tischeria, Chrysopeleia, Profenusa</i> | 6 |
| 43 | 111.917996  | 33.49643733 | 947  | <i>Phyllonorycter, Stigmella, Tischeria, Trachys, Chrysopeleia, Profenusa</i>    | 6 |
| 44 | 111.9172446 | 33.49554189 | 916  | <i>Phyllonorycter, Stigmella, Tischeria, Chrysopeleia, Profenusa</i>             | 5 |
| 45 | 111.9169225 | 33.49442287 | 915  | <i>Phyllonorycter, Stigmella, Tischeria, Chrysopeleia, Profenusa</i>             | 5 |
| 46 | 111.9161712 | 33.49379598 | 909  | <i>Phyllonorycter, Stigmella, Tischeria, Profenusa</i>                           | 4 |
| 47 | 111.9181407 | 33.49461139 | 889  | <i>Acrocercops, Phyllonorycter, Stigmella, Chrysopeleia, Profenusa</i>           | 5 |
| 48 | 111.9194825 | 33.49527892 | 875  | <i>Ectoedemia, Phyllonorycter, Stigmella, Tischeria, Chrysopeleia, Profenusa</i> | 6 |
| 49 | 111.9183231 | 33.49376111 | 858  | <i>Phyllonorycter, Stigmella, Tischeria, Chrysopeleia, Profenusa</i>             | 5 |
| 50 | 111.9175019 | 33.49258811 | 855  | <i>Ectoedemia, Phyllonorycter, Stigmella, Tischeria, Chrysopeleia, Profenusa</i> | 6 |
| 52 | 111.9129947 | 33.49312811 | 845  | <i>Phyllonorycter, Stigmella, Tischeria, Profenusa</i>                           | 4 |
| 53 | 111.9122973 | 33.4937993  | 841  | <i>Phyllonorycter, Stigmella, Tischeria, Profenusa</i>                           | 4 |



|    |             |             |     |                                                                                   |   |
|----|-------------|-------------|-----|-----------------------------------------------------------------------------------|---|
| 51 | 111.9159725 | 33.49238607 | 839 | <i>Phyllonorycter, Stigmella, Tischeria, Profenusa</i>                            | 4 |
| 54 | 111.9125657 | 33.49523154 | 830 | <i>Ectoedemia, Phyllonorycter, Stigmella, Tischeria, Profenusa</i>                | 5 |
| 55 | 111.9105323 | 33.49435397 | 822 | <i>Acrocercops, Phyllonorycter, Stigmella, Tischeria, Chrysopeleia, Profenusa</i> | 6 |
| 59 | 111.901592  | 33.49643564 | 807 | <i>Phyllonorycter, Stigmella, Tischeria, Profenusa</i>                            | 4 |
| 58 | 111.9023855 | 33.49516441 | 792 | <i>Phyllonorycter, Tischeria, Profenusa</i>                                       | 3 |
| 56 | 111.9058176 | 33.49468054 | 790 | <i>Ectoedemia, Phyllonorycter, Stigmella, Tischeria, Profenusa</i>                | 5 |
| 57 | 111.9042302 | 33.49495372 | 781 | <i>Phyllonorycter, Stigmella, Tischeria, Profenusa</i>                            | 4 |
| 60 | 111.897946  | 33.49482566 | 746 | <i>Phyllonorycter, Stigmella, Tischeria, Profenusa</i>                            | 4 |
| 61 | 111.8955819 | 33.49481779 | 725 | <i>Phyllonorycter, Tischeria, Chrysopeleia, Profenusa</i>                         | 4 |
| 62 | 111.8930784 | 33.49133711 | 682 | <i>Ectoedemia, Phyllonorycter, Stigmella, Tischeria, Profenusa</i>                | 5 |
| 63 | 111.8914489 | 33.48949412 | 669 | <i>Ectoedemia, Phyllonorycter, Stigmella, Tischeria, Profenusa</i>                | 5 |
| 64 | 111.8893265 | 33.48840351 | 644 | <i>Phyllonorycter, Stigmella, Tischeria</i>                                       | 3 |
| 65 | 111.8882546 | 33.48607682 | 636 | <i>Acrocercops, Phyllonorycter, Tischeria, Profenusa</i>                          | 4 |
| 66 | 111.88804   | 33.48392846 | 633 | <i>Ectoedemia, Phyllonorycter, Stigmella, Tischeria, Profenusa</i>                | 5 |

Note: Sampled trees with the strikeout were not included in our analysis because of several tree samples at the same location.

**Table S5.** Number of leaf miner genera on *Quercus variabilis* Blume at different altitudes at Houyemiao, Qiliping County

| Sampled tree No. | Longitude (°) | Latitude (°) | Elevation (m) | Leaf miner genera                                                                          | Number of genera |
|------------------|---------------|--------------|---------------|--------------------------------------------------------------------------------------------|------------------|
| 82               | 111.8937642   | 33.32096679  | 637           | <i>Stigmella, Tischeria</i>                                                                | 2                |
| 83               | 111.8947666   | 33.32152688  | 637           | <i>Ectoedemia, Phyllonorycter, Stigmella, Tischeria, Profenusa</i>                         | 5                |
| 84               | 111.8929817   | 33.32124085  | 586           | <i>Phyllonorycter, Stigmella, Tischeria, Chrysopeleia, Profenusa</i>                       | 2                |
| 81               | 111.8929067   | 33.32118707  | 588           | <i>Phyllonorycter, Profenusa</i>                                                           | 5                |
| 85               | 111.8926226   | 33.32141599  | 571           | <i>Acrocercops, Ectoedemia, Phyllonorycter, Stigmella, Tischeria, Trachys</i>              | 6                |
| 88               | 111.8884961   | 33.32281375  | 563           | <i>Ectoedemia, Phyllonorycter, Stigmella, Tischeria, Profenusa</i>                         | 5                |
| 80               | 111.8921027   | 33.32073906  | 560           | <i>Ectoedemia, Phyllonorycter, Stigmella, Tischeria, Profenusa</i>                         | 5                |
| 86               | 111.8909344   | 33.32182973  | 553           | <i>Acrocercops, Phyllonorycter, Profenusa</i>                                              | 3                |
| 89               | 111.8877459   | 33.3227695   | 552           | <i>Ectoedemia, Phyllonorycter, Stigmella, Tischeria,</i>                                   | 4                |
| 87               | 111.8903342   | 33.32175839  | 550           | <i>Ectoedemia, Phyllonorycter, Stigmella, Tischeria, Chrysopeleia, Profenusa</i>           | 6                |
| 90               | 111.887494    | 33.32252302  | 537           | <i>Ectoedemia, Phyllonorycter, Stigmella, Tischeria, Profenusa</i>                         | 5                |
| 91               | 111.8871886   | 33.32201197  | 523           | <i>Ectoedemia, Phyllonorycter, Stigmella, Profenusa</i>                                    | 4                |
| 79               | 111.8910575   | 33.32007146  | 497           | <i>Ectoedemia, Phyllonorycter, Stigmella, Tischeria, Profenusa</i>                         | 5                |
| 78               | 111.890618    | 33.31973089  | 477           | <i>Ectoedemia, Phyllonorycter, Stigmella, Tischeria, Profenusa</i>                         | 5                |
| 92               | 111.8869044   | 33.3204738   | 467           | <i>Ectoedemia, Phyllonorycter, Stigmella, Tischeria, Trachys, Profenusa</i>                | 6                |
| 93               | 111.8867972   | 33.32029449  | 463           | <i>Ectoedemia, Phyllonorycter, Stigmella, Tischeria, Trachys,</i>                          | 5                |
| 77               | 111.8900124   | 33.31906301  | 457           | <i>Ectoedemia, Phyllonorycter, Stigmella, Tischeria, Profenusa</i>                         | 5                |
| 74               | 111.8885653   | 33.31803248  | 439           | <i>Ectoedemia, Phyllonorycter, Stigmella</i>                                               | 3                |
| 75               | 111.8891013   | 33.31830119  | 438           | <i>Acrocercops, Dactylispa, Phyllonorycter, Stigmella, Tischeria, Tischeria, Profenusa</i> | 7                |
| 76               | 111.8893692   | 33.31861496  | 437           | <i>Ectoedemia, Phyllonorycter, Stigmella, Profenusa</i>                                    | 4                |
| 73               | 111.888351    | 33.31773213  | 436           | <i>Ectoedemia, Phyllonorycter, Stigmella, Profenusa</i>                                    | 4                |
| 72               | 111.8879758   | 33.31732875  | 430           | <i>Phyllonorycter</i>                                                                      | 1                |
| 71               | 111.8877615   | 33.31719436  | 423           | <i>Ectoedemia, Phyllonorycter, Stigmella, Profenusa</i>                                    | 4                |

|    |             |             |     |                                                                                          |   |
|----|-------------|-------------|-----|------------------------------------------------------------------------------------------|---|
| 70 | 111.8881151 | 33.31661546 | 414 | <i>Acrocercops, Phyllonorycter, Stigmella, Tischeria, Chrysopeleia, Profenusa</i>        | 6 |
| 69 | 111.8883722 | 33.31600524 | 383 | <i>Acrocercops, Ectoedemia, Phyllonorycter, Stigmella, Tischeria, Profenusa</i>          | 6 |
| 94 | 111.885468  | 33.31595385 | 348 | <i>Ectoedemia, Phyllonorycter, Stigmella, Tischeria, Profenusa</i>                       | 5 |
| 68 | 111.8877236 | 33.31384375 | 333 | <i>Acrocercops, Ectoedemia, Phyllonorycter, Stigmella, Tischeria, Trachys, Profenusa</i> | 7 |
| 67 | 111.8874128 | 33.31330573 | 330 | <i>Phyllonorycter, Stigmella, Tischeria, Profenusa</i>                                   | 4 |

Table S6. Moran's index output from the 'modifiedttest' function in the "SpatialPack" R package

| Number of cells for Moran's index | Moran Index |                        |        |        |                           |        |        |                         |        |        |
|-----------------------------------|-------------|------------------------|--------|--------|---------------------------|--------|--------|-------------------------|--------|--------|
|                                   | Elevation   | Taxonomic Hill numbers |        |        | Phylogenetic Hill numbers |        |        | Functional Hill numbers |        |        |
|                                   |             | q=0                    | q=1    | q=2    | q=0                       | q=1    | q=2    | q=0                     | q=1    | q=2    |
| 1                                 | 1.137       | 0.004                  | 0.102  | 0.173  | 0.029                     | 0.190  | 0.226  | 0.010                   | 0.058  | 0.093  |
| 2                                 | 0.762       | -0.082                 | -0.021 | 0.034  | -0.087                    | 0.058  | 0.123  | -0.096                  | -0.110 | -0.100 |
| 3                                 | 0.322       | -0.032                 | -0.155 | -0.224 | -0.034                    | -0.175 | -0.194 | -0.016                  | -0.021 | -0.056 |
| 4                                 | 0.168       | 0.045                  | 0.051  | -0.022 | 0.123                     | 0.066  | -0.055 | 0.057                   | 0.190  | 0.249  |
| 5                                 | 0.061       | -0.118                 | -0.167 | -0.132 | -0.074                    | -0.115 | -0.095 | -0.132                  | -0.207 | -0.227 |
| 6                                 | -0.016      | 0.101                  | -0.193 | -0.291 | 0.056                     | -0.177 | -0.203 | 0.132                   | -0.001 | -0.099 |
| 7                                 | -0.080      | 0.027                  | -0.175 | -0.304 | -0.058                    | -0.303 | -0.375 | 0.016                   | -0.037 | -0.056 |
| 8                                 | -0.157      | -0.014                 | -0.146 | -0.258 | -0.046                    | -0.335 | -0.420 | -0.037                  | -0.095 | -0.152 |
| 9                                 | -0.315      | 0.057                  | -0.074 | -0.185 | -0.018                    | -0.332 | -0.394 | 0.054                   | -0.039 | -0.106 |
| 10                                | -0.675      | -0.082                 | 0.100  | 0.125  | -0.005                    | 0.109  | 0.075  | -0.075                  | 0.012  | 0.050  |
| 11                                | -1.081      | 0.010                  | 0.057  | 0.090  | 0.033                     | 0.097  | 0.113  | -0.002                  | 0.049  | 0.061  |
| 12                                | -1.571      | -0.008                 | -0.006 | 0.053  | -0.090                    | -0.003 | 0.070  | 0.003                   | -0.086 | -0.089 |
| 13                                | -1.981      | 0.032                  | -0.044 | -0.071 | 0.028                     | -0.054 | -0.036 | 0.025                   | -0.025 | -0.059 |
